# Supplementary material for: Membranous nephropathy in the UK Biobank
Source: PubMed Central journal article supplement (PMC10138203; doi:10.1371/journal.pone.0281795), 2023-04-27
Supplement: pone.0281795.s002.pdf [file pone.0281795.s002.pdf]

|                              | Description                                                 | Details                                                           | Biobank Field                                                                                     |
|------------------------------|-------------------------------------------------------------|-------------------------------------------------------------------|---------------------------------------------------------------------------------------------------|
| Table                        | Age                                                         |                                                                   | f.21003.0.0                                                                                       |
| 2                            | Sex                                                         |                                                                   | f.31.0.0                                                                                          |
|                              | Ethnicity                                                   |                                                                   | f.21000.0.0                                                                                       |
|                              | BMI                                                         |                                                                   | f.21001.0.0                                                                                       |
|                              | Smoking                                                     | Current smoker                                                    | f.20116.0.0                                                                                       |
|                              | Alcohol                                                     |                                                                   | f.20117.0.0                                                                                       |
|                              | Alcohol Frequency                                           |                                                                   | f.1558.0.0                                                                                        |
|                              | Townsend Deprivation                                        |                                                                   | f.189.0.0                                                                                         |
|                              | IMD                                                         |                                                                   | f.26410.0.0   f.26426.0.0   f.26427.0.0<br>(Three fields, use later ones if earlier ones missing) |
| Tables<br>2,3                | N022                                                        | HES data: ICD code in any of primary or secondary diagnosis codes | f.41202,f.41204: ICD code in either field                                                         |
|                              | N032                                                        |                                                                   |                                                                                                   |
|                              | N042                                                        |                                                                   |                                                                                                   |
|                              | N052                                                        |                                                                   |                                                                                                   |
|                              | Putative MN                                                 | Any of N022,N032,N042,N052                                        |                                                                                                   |
|                              | CKD                                                         | Any N18                                                           |                                                                                                   |
|                              | MN diagnosis date                                           | HES                                                               | HES data: visit date of first event                                                               |
| Follow-up Time               | (Last HES refresh date   date of death)-baseline visit date | min(2019-03-01,f.40000.0.0) - f.53.0.0                            |                                                                                                   |
| Tables<br>4,5,<br>S2, S3, S5 | HLADQ1 (GWAS1)                                              | rs2187668 Ch 6                                                    | Relevant SNPs extracted from the bulk genetic data (see methods)                                  |
|                              | PLA2R1 (GWAS1)                                              | rs4664308 Ch 2                                                    |                                                                                                   |
|                              | HLADQ1 (GWAS2)                                              | rs9272729 Ch 6                                                    |                                                                                                   |
|                              | PLA2R1 (GWAS2)                                              | rs17830558 Ch 2                                                   |                                                                                                   |
|                              | HLADRB1/DQA1 (GWAS3)                                        | rs9271573                                                         |                                                                                                   |
|                              | PLA2R1 (GWAS3)                                              | rs17831251                                                        |                                                                                                   |
|                              | NFKB1 (GWAS3)                                               | rs230540                                                          |                                                                                                   |
|                              | IRF4 (GWAS3)                                                | rs9405192                                                         |                                                                                                   |
| Table<br>6                   | NO2: 2005                                                   |                                                                   | f.24016.0.0                                                                                       |
|                              | NO2: 2006                                                   |                                                                   | f.24017.0.0                                                                                       |
|                              | NO2: 2007                                                   |                                                                   | f.24018.0.0                                                                                       |
|                              | NO2: 2010                                                   |                                                                   | f.24003.0.0                                                                                       |
|                              | NO: 2010                                                    |                                                                   | f.24004.0.0                                                                                       |
|                              | PM: <2.5                                                    |                                                                   | f.24006.0.0                                                                                       |
|                              | PM: 2.5-10                                                  |                                                                   | f.24008.0.0                                                                                       |
|                              | PM >10                                                      |                                                                   | f.24005.0.0                                                                                       |
|                              | Distance to main road                                       | reciprocal of Biobank variable                                    | f.24012.0.0                                                                                       |
| Tables<br>3,<br>S4, S5       | Self-reported Renal Failure                                 | Self-report                                                       | f.20002.0 contains 1192 1193 1194                                                                 |
|                              | HES CKD                                                     |                                                                   | f.41202,f.41204 HES ICD code N18                                                                  |
|                              | HES Renal Disease                                           |                                                                   | f.41202,f.41204 HES ICD code N0*,N1*                                                              |
|                              | Algorithmically derived ESRD                                |                                                                   | f.42026.0.0                                                                                       |
|                              | uACR                                                        | Albumin/Creatinine                                                | f.30500.0.0,f.30510.0.0                                                                           |
|                              | eGFR                                                        |                                                                   | computed from above and demographic data                                                          |
|                              | Self-reported Diabetes                                      | Self-report                                                       | f.20002.0 contains 1222 1223 1521                                                                 |
|                              | HES Diabetes                                                | HES                                                               | f.41202;f.41204 HES ICD codes E10,E11,E12,E13,E14                                                 |

|           |                           |             |                                                                                                   |
|-----------|---------------------------|-------------|---------------------------------------------------------------------------------------------------|
|           | Self Report Coeliac       | Self-report | f.20002.0 contains 1456                                                                           |
|           | HES Coeliac               | HES         | HES ICD code = K900                                                                               |
|           | Self-reported RenalBiopsy | Self-report | Any f.20004.0.*=1618                                                                              |
|           | OPCS RenalBiopsy          | HES         | HES operation codes:<br>M08.1,M11.1,M11.2,M11.3,M11.8,M11.9,M13.1                                 |
| Table     | Vapours                   |             | Derived from occupation exposure matrix and SOC                                                   |
| S6        | Gases                     |             | codes in f.22617.0.0 (see methods)                                                                |
|           | Dusts                     |             |                                                                                                   |
|           | Biological Dusts          |             |                                                                                                   |
|           | Mineral Dusts             |             |                                                                                                   |
|           | Fumes                     |             |                                                                                                   |
|           | Diesel                    |             |                                                                                                   |
|           | Fibres                    |             |                                                                                                   |
|           | Mists                     |             |                                                                                                   |
|           | Asthmagens                |             |                                                                                                   |
|           | Metals                    |             |                                                                                                   |
|           | Gases or Fumes            |             |                                                                                                   |
|           | VGDF                      |             |                                                                                                   |
|           | VGDFFM                    |             |                                                                                                   |
| Figure S7 | Date of GP diagnosis      |             | Derived from dates of GP records with the relevant<br>Read2/3 codes for putative MN (see methods) |

Table S1 Biobank fields and variable definitions
