# Supplementary material for: Membranous nephropathy in the UK Biobank
Source: PubMed Central journal article supplement (PMC10138203; doi:10.1371/journal.pone.0281795), 2023-04-27
Supplement: pone.0281795.s003.pdf [file pone.0281795.s003.pdf]

|                      |                      |                           | Allele Frequency (%)  |                       |
|----------------------|----------------------|---------------------------|-----------------------|-----------------------|
| GWAS1                | HLADQA1<br>rs2187668 | CC                        | 357516/487208 (73.4%) |                       |
|                      |                      | CT                        | 118070/487208 (24.2%) |                       |
|                      |                      | TT                        | 11622/487208 (2.4%)   |                       |
|                      |                      | MAF                       | 14.5%                 |                       |
|                      | PLA2R1<br>rs4664308  | AA                        | 174588/487208 (35.8%) |                       |
|                      |                      | AG                        | 230759/487208 (47.4%) |                       |
|                      |                      | GG                        | 81861/487208 (16.8%)  |                       |
|                      |                      | MAF                       | 40.5%                 |                       |
|                      | GWAS2                | HLADQA1<br>rs9272729      | GG                    | 351417/479895 (73.2%) |
|                      |                      |                           | GA                    | 117731/479895 (24.5%) |
| AA                   |                      |                           | 10747/479895 (2.2%)   |                       |
| MAF                  |                      |                           | 14.5%                 |                       |
| PLA2R1<br>rs17830558 |                      | TT                        | 105620/472780 (22.3%) |                       |
|                      |                      | TG                        | 228842/472780 (48.4%) |                       |
|                      |                      | GG                        | 138318/472780 (29.3%) |                       |
|                      |                      | MAF                       | 46.5%                 |                       |
| GWAS3                |                      | HLADRB1/DQA1<br>rs9271573 | CC                    | 170192/486978 (34.9%) |
|                      |                      |                           | AC                    | 234411/486978 (48.1%) |
|                      | AA                   |                           | 82375/486978 (16.9%)  |                       |
|                      | MAF                  |                           | 41%                   |                       |
|                      | PLA2R1<br>rs17831251 | CC                        | 172495/481109 (35.9%) |                       |
|                      |                      | CT                        | 227843/481109 (47.4%) |                       |
|                      |                      | TT                        | 80771/481109 (16.8%)  |                       |
|                      |                      | MAF                       | 40.5%                 |                       |
|                      | NFKB1<br>rs230540    | TT                        | 205265/481333 (42.6%) |                       |
|                      |                      | CT                        | 216576/481333 (45.0%) |                       |
| CC                   |                      | 59492/481333 (12.4%)      |                       |                       |
| MAF                  |                      | 34.9%                     |                       |                       |
| IRF4<br>rs9405192    | GG                   | 259096/474386 (54.6%)     |                       |                       |
|                      | GA                   | 182247/474386 (38.4%)     |                       |                       |
|                      | AA                   | 33043/474386 (7.0%)       |                       |                       |
|                      | MAF                  | 26.2%                     |                       |                       |

Table S2 – Allele counts at the lead SNPs from GWAS1<sup>4</sup>, GWAS2<sup>5</sup>, and GWAS3<sup>6</sup> in all UK Biobank participants using the imputed UK Biobank datasets. GWAS – Genome-Wide Association Study, MAF – minor allele frequency, SNP – single nucleotide polymorphism
