# Supplementary material for: Membranous nephropathy in the UK Biobank
Source: PubMed Central journal article supplement (PMC10138203; doi:10.1371/journal.pone.0281795), 2023-04-27
Supplement: pone.0281795.s004.pdf [file pone.0281795.s004.pdf]

|                               |    | GWAS1 PLA2R1 rs4664308  |                |               |
|-------------------------------|----|-------------------------|----------------|---------------|
|                               |    | AA                      | AG             | GG            |
| GWAS1<br>HLADQA1<br>rs2187668 | CC | 129287 (26.5%)          | 168473 (34.6%) | 59756 (12.3%) |
|                               | CT | 41222 (8.5%)            | 56717 (11.6%)  | 20131 (4.1%)  |
|                               | TT | 4079 (0.8%)             | 5569 (1.1%)    | 1974 (0.4%)   |
|                               |    | GWAS2 PLA2R1 rs17830558 |                |               |
|                               |    | GG                      | TG             | TT            |
| GWAS2<br>HLADQA1<br>rs9272729 | AA | 3167 (0.7%)             | 5042 (1.1%)    | 2230 (0.5%)   |
|                               | GA | 33948 (7.3%)            | 56205 (12.1%)  | 24352 (5.2%)  |
|                               | GG | 99131 (21.3%)           | 164081 (35.2%) | 77518 (16.6%) |

Table S3 – Counts of genotype combinations at the lead SNPs from GWAS1<sup>4</sup> and GWAS2<sup>5</sup> in all UK Biobank participants using both the imputed UK Biobank datasets. GWAS – Genome-Wide Association Study, SNP – single nucleotide polymorphism
