# Supplementary material for: Membranous nephropathy in the UK Biobank
Source: PubMed Central journal article supplement (PMC10138203; doi:10.1371/journal.pone.0281795), 2023-04-27
Supplement: pone.0281795.s005.pdf [file pone.0281795.s005.pdf]

|                                                  |                             | Low or medium risk genotype<br>No TTAA | High risk genotype<br>TTAA |
|--------------------------------------------------|-----------------------------|----------------------------------------|----------------------------|
|                                                  |                             | N= 498,428                             | N= 4,079                   |
| Self-reported Kidney Failure                     |                             | 878/498428 (0.2%)                      | 6/4079 (0.1%)              |
| HES CKD                                          |                             | 9003/498428 (1.8%)                     | 79/4079 (1.9%)             |
| HES Kidney Disease                               |                             | 21826/498428 (4.4%)                    | 205/4079 (5.0%)            |
| Algorithmically derived ESKD                     |                             | 1184/498428 (0.2%)                     | 7/4079 (0.2%)              |
| uACR at baseline<br>(mg/mmol)                    | <3                          | 454866/480358 (94.7%)                  | 3717/3936 (94.4%)          |
|                                                  | 3-30                        | 23237/480358 (4.8%)                    | 191/3936 (4.9%)            |
|                                                  | 30-250                      | 2118/480358 (0.4%)                     | 25/3936 (0.6%)             |
|                                                  | >250                        | 137/480358 (0.03%)                     | 3/3936 (0.08%)             |
|                                                  | Median (IQR)                | 0.4 (0.4-0.6)                          | 0.4 (0.4-0.6)              |
| eGFR at baseline<br>(ml/min/1.73m <sup>2</sup> ) | Unknown                     | 18070                                  | 143                        |
|                                                  | ≥90                         | 275085/464974 (59.2%)                  | 2288/3896 (58.7%)          |
|                                                  | 60-90                       | 179252/464974 (38.6%)                  | 1508/3896 (38.7%)          |
|                                                  | 15-60                       | 10496/464974 (2.3%)                    | 99/3896 (2.5%)             |
|                                                  | <15                         | 141/464974 (0.03%)                     | 1/3896 (0.03%)             |
| Median (IQR)                                     | 92.8 (82.9-100.1) [missing] | 92.7 (82.6-100.3) [missing]            |                            |
| Unknown                                          | 33454                       | 183                                    |                            |
| Self-reported Diabetes                           |                             | 25220/498428 (5.1%)                    | 260/4079 (6.4%)            |
| HES Diabetes                                     |                             | 30975/498428 (6.2%)                    | 308/4079 (7.6%)            |
| Self-reported Coeliac Disease                    |                             | 1934/498428 (0.4%)                     | 115/4079 (2.8%)            |
| HES Coeliac Disease                              |                             | 2351/498428 (0.5%)                     | 131/4079 (3.2%)            |
| Self-reported Kidney Biopsy                      |                             | 129/498428 (0.03%)                     | 3/4079 (0.07%)             |
| OPCS Kidney Biopsy                               |                             | 292/410203 (0.07%)                     | 2/3414 (0.06%)             |

Table S4 – Phenotype per combined genotype group at HLADQA1 (rs2187668, test allele T) and PLA2R1 (rs4664308, test allele A) from GWAS1<sup>4</sup> in all UK Biobank participants using the directly genotyped UK Biobank dataset. MN = Membranous Nephropathy, HES = Hospital Episode Statistics, CKD = Chronic Kidney Disease, ESKD = End-Stage Kidney Disease, ACR = urinary albumin:creatinine ratio, eGFR = estimated Glomerular Filtration Rate, IQR = Inter-Quartile Range, SD = Standard Deviation, OPCS = OPCS Classification of Interventions and Procedures
