# Supplementary material for: Membranous nephropathy in the UK Biobank
Source: PubMed Central journal article supplement (PMC10138203; doi:10.1371/journal.pone.0281795), 2023-04-27
Supplement: pone.0281795.s006.pdf [file pone.0281795.s006.pdf]

| ACR > 3 mg/mmol prevalence             |                      | N (%)               | RR                |
|----------------------------------------|----------------------|---------------------|-------------------|
| Kidney Failure                         | NO                   | 25360/483509 (5.2%) | 1                 |
|                                        | Yes                  | 351/785 (44.7%)     | 8.5 (7.9-9.2)     |
| Diabetes                               | NO                   | 21491/459995 (4.7%) | 1                 |
|                                        | Yes                  | 4220/24299 (17.4%)  | 3.7 (3.6-3.8)     |
| Diabetes / Kidney Failure combinations | No/No                | 21240/459377 (4.6%) | 1                 |
|                                        | Yes/NO               | 4120/24132 (17.1%)  | 3.7 (3.6-3.8)     |
|                                        | No/Yes               | 251/618 (40.6%)     | 8.8 (8.0-9.7)     |
|                                        | Yes/Yes              | 100/167 (59.9%)     | 13 (11.4-14.7)    |
| ACR >30 mg/mmol prevalence             |                      |                     |                   |
| Kidney Failure                         | NO                   | 2134/483509 (0.4%)  | 1                 |
|                                        | Yes                  | 149/785 (19.0%)     | 43 (37-50)        |
| Diabetes                               | NO                   | 1652/459995 (0.4%)  | 1                 |
|                                        | Yes                  | 631/24299 (2.6%)    | 7.2 (6.6-7.9)     |
| Diabetes / Kidney Failure combinations | No/No                | 1552/459377 (0.3%)  | 1                 |
|                                        | Yes/NO               | 582/24132 (2.4%)    | 7.1 (6.5-7.8)     |
|                                        | No/Yes               | 100/618 (16.2%)     | 47.9 (39.8-57.7)  |
|                                        | Yes/Yes              | 49/167 (29.3%)      | 86.8 (68.3-110.5) |
| ACR >3 mg/mmol prevalence              |                      |                     |                   |
| GWAS1                                  | CC                   | 18563/347004 (5.3%) | 1                 |
|                                        | CT                   | 5852/114580 (5.1%)  | 0.95 (0.93-0.98)  |
| HLADQA1<br>rs2187668                   | TT                   | 563/11243 (5.0%)    | 0.94 (0.86-1.02)  |
|                                        | GG                   | 4142/79512 (5.2%)   | 1                 |
| GWAS1                                  | AG                   | 11612/224105 (5.2%) | 0.99 (0.96-1.03)  |
|                                        | AA                   | 9224/169210 (5.5%)  | 1.05 (1.01-1.08)  |
| PLA2R1<br>rs4664308                    | GG                   | 18242/341085 (5.3%) | 1                 |
|                                        | AG                   | 5831/114258 (5.1%)  | 0.95 (0.93-0.98)  |
| GWAS2                                  | AA                   | 520/10396 (5.0%)    | 0.94 (0.86-1.02)  |
|                                        | GG                   | 6953/134353 (5.2%)  | 1                 |
| GWAS2                                  | AG                   | 11514/222065 (5.2%) | 1 (0.97-1.03)     |
|                                        | AA                   | 5761/102396 (5.6%)  | 1.09 (1.05-1.12)  |
| PLA2R1<br>rs17830558                   | GG                   | 607/134353 (0.5%)   | 1                 |
|                                        | AG                   | 1012/222065 (0.5%)  | 1.01 (0.91-1.12)  |
| GWAS2                                  | AA                   | 520/102396 (0.5%)   | 1.12 (1-1.26)     |
|                                        | CC                   | 1621/347004 (0.5%)  | 1                 |
| GWAS1                                  | CT                   | 529/114580 (0.5%)   | 0.99 (0.9-1.09)   |
|                                        | TT                   | 61/11243 (0.5%)     | 1.16 (0.9-1.5)    |
| HLADQA1<br>rs2187668                   | GG                   | 358/79512 (0.5%)    | 1                 |
|                                        | AG                   | 1004/224105 (0.4%)  | 1 (0.88-1.12)     |
| PLA2R1<br>rs4664308                    | AA                   | 849/169210 (0.5%)   | 1.11 (0.99-1.26)  |
|                                        | GG                   | 1596/341085 (0.5%)  | 1                 |
| GWAS2                                  | AG                   | 532/114258 (0.5%)   | 1 (0.9-1.1)       |
|                                        | AA                   | 55/10396 (0.5%)     | 1.13 (0.86-1.48)  |
| HLADQA1<br>rs9272729                   | GG                   | 607/134353 (0.5%)   | 1                 |
|                                        | AG                   | 1012/222065 (0.5%)  | 1.01 (0.91-1.12)  |
| GWAS2                                  | AA                   | 520/102396 (0.5%)   | 1.12 (1-1.26)     |
|                                        | PLA2R1<br>rs17830558 | AA                  | 520/102396 (0.5%) |

Table S5 – Phenotype and genotype by degree of proteinuria for all UK Biobank participants, with genotypes obtained from the imputed UK Biobank dataset at the lead SNPs from GWAS1<sup>4</sup> and GWAS2<sup>5</sup>. GWAS – Genome-Wide Association Study, SNP – single nucleotide polymorphism, ACR = urinary albumin:creatinine ratio, RR – Relative Risk
