# Supplementary material for: Membranous nephropathy in the UK Biobank
Source: PubMed Central journal article supplement (PMC10138203; doi:10.1371/journal.pone.0281795), 2023-04-27
Supplement: pone.0281795.s007.pdf [file pone.0281795.s007.pdf]

| Occupational Exposure                  |             | N (%)          |            | RR (95% CI)         |
|----------------------------------------|-------------|----------------|------------|---------------------|
|                                        |             | No MN          | MN         |                     |
| Vapours                                | Not Exposed | 264341 (91.3%) | 44 (86.3%) | 1                   |
|                                        | Exposed     | 60666 (18.7%)  | 7 (13.7%)  | 0.693 (0.312-1.539) |
| Gases                                  | Not Exposed | 277742 (85.5%) | 46 (90.2%) | 1                   |
|                                        | Exposed     | 47265 (14.5%)  | 5 (9.8%)   | 0.639 (0.254-1.607) |
| Dusts                                  | Not Exposed | 237450 (73.1%) | 39 (76.5%) | 1                   |
|                                        | Exposed     | 87557 (26.9%)  | 12 (23.5%) | 0.834 (0.437-1.594) |
| Biological Dusts                       | Not Exposed | 278703 (85.8%) | 44 (86.3%) | 1                   |
|                                        | Exposed     | 46304 (14.2%)  | 7 (13.7%)  | 0.958 (0.431-2.126) |
| Mineral Dusts                          | Not Exposed | 272337 (83.8%) | 44 (86.3%) | 1                   |
|                                        | Exposed     | 52670 (16.2%)  | 7 (13.7%)  | 0.823 (0.371-1.826) |
| Fumes                                  | Not Exposed | 272639 (83.9%) | 44 (86.3%) | 1                   |
|                                        | Exposed     | 52368 (16.1%)  | 7 (13.7%)  | 0.828 (0.373-1.839) |
| Diesel                                 | Not Exposed | 298495 (91.8%) | 46 (90.2%) | 1                   |
|                                        | Exposed     | 26512 (8.2%)   | 5 (9.8%)   | 1.224 (0.486-3.079) |
| Fibres                                 | Not Exposed | 296119 (91.8%) | 47 (92.2%) | 1                   |
|                                        | Exposed     | 28888 (8.9%)   | 4 (7.8%)   | 0.872 (0.314-2.421) |
| Mists                                  | Not Exposed | 282350 (86.9%) | 46 (90.2%) | 1                   |
|                                        | Exposed     | 42657 (13.1%)  | 5 (9.8%)   | 0.719 (0.286-1.811) |
| Asthmagens                             | Not Exposed | 255602 (78.6%) | 42 (82.4%) | 1                   |
|                                        | Exposed     | 69405 (21.4%)  | 9 (7.6%)   | 0.789 (0.384-1.621) |
| Metals                                 | Not Exposed | 303918 (93.5%) | 49 (96.1%) | 1                   |
|                                        | Exposed     | 21089 (6.5%)   | 2 (3.9%)   | 0.588 (0.143-2.419) |
| Gases or Fumes                         | Not Exposed | 300798 (92.6%) | 47 (92.2%) | 1                   |
|                                        | Exposed     | 24209 (7.4%)   | 4 (7.8%)   | 1.057 (0.381-2.935) |
| VGDF (Vapours, Gases, Dusts, or Fumes) | Not Exposed | 215762 (66.4%) | 35 (68.6%) | 1                   |
|                                        | Exposed     | 109245 (33.6%) | 16 (31.4%) | 0.903 (0.500-1.631) |
| VGDFFM (Any Exposures)                 | Not Exposed | 215575 (66.3%) | 35 (68.6%) | 1                   |
|                                        | Exposed     | 109432 (33.7%) | 16 (31.4%) | 0.901 (0.498-1.627) |

Table S6 – environmental exposures – work-related
